# Supplementary material for: Natural display of nuclear-encoded RNA on the cell surface and its impact on cell interaction
Source: PubMed Central journal article supplement (PMC7488101; doi:10.1186/s13059-020-02145-6), 2020-09-10
Supplement: 13059_2020_2145_MOESM1_ESM.pdf [file 13059_2020_2145_MOESM1_ESM.pdf]

## Supplementary figures

Fig. S1: Size distribution of surface RNAs analyzed in Surface-seq. (A) Bioanalyzer derived fluorescence intensity (y axis) versus RNA size (x axis) from EL4 surface RNAs extracted by Surface-seq variation 1. (B-C) Two biological replicates of (A). (D-E) Bioanalyzer derived fluorescence intensity (y axis) versus RNA size (x axis) from EL4 surface RNAs extracted by Surface-seq variation 2 from 2 biological replicates. (F) RNA ladder. FU: fluorescence intensity.

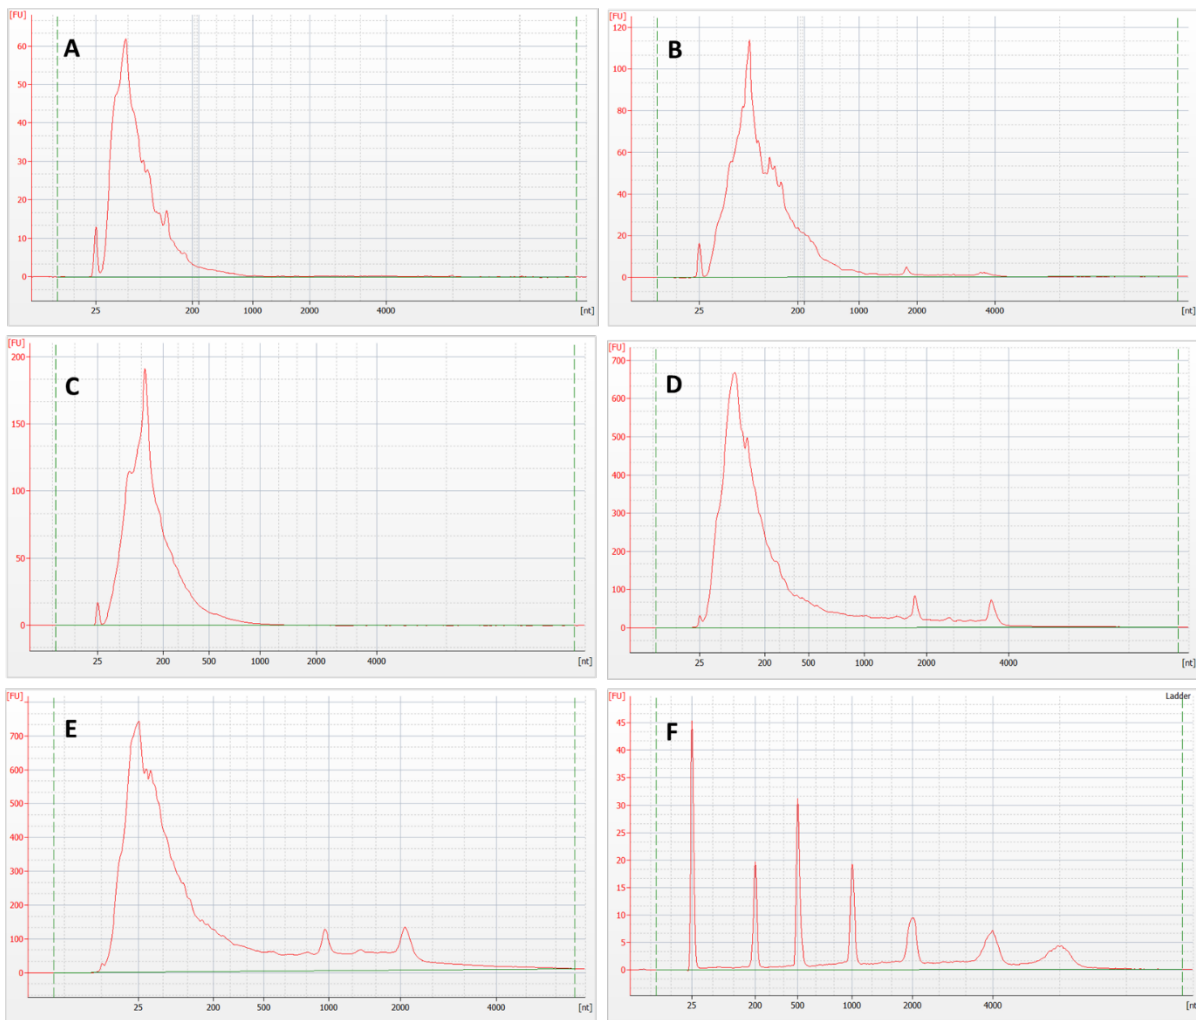

Fig. S2: Size distribution of the Surface-seq constructed sequencing libraries. (A-C) Fluorescence intensity (y axis) versus DNA size (x axis) from 3 biological replicates obtained by Surface-seq variation 1, measured by TapeStation (A, B) and bioanalyzer (C). (D-E) Fluorescence intensity (y axis) versus DNA size (x axis) from 2 biological replicates obtained by Surface-seq variation 2. (F) DNA ladder. FU: fluorescence intensity.

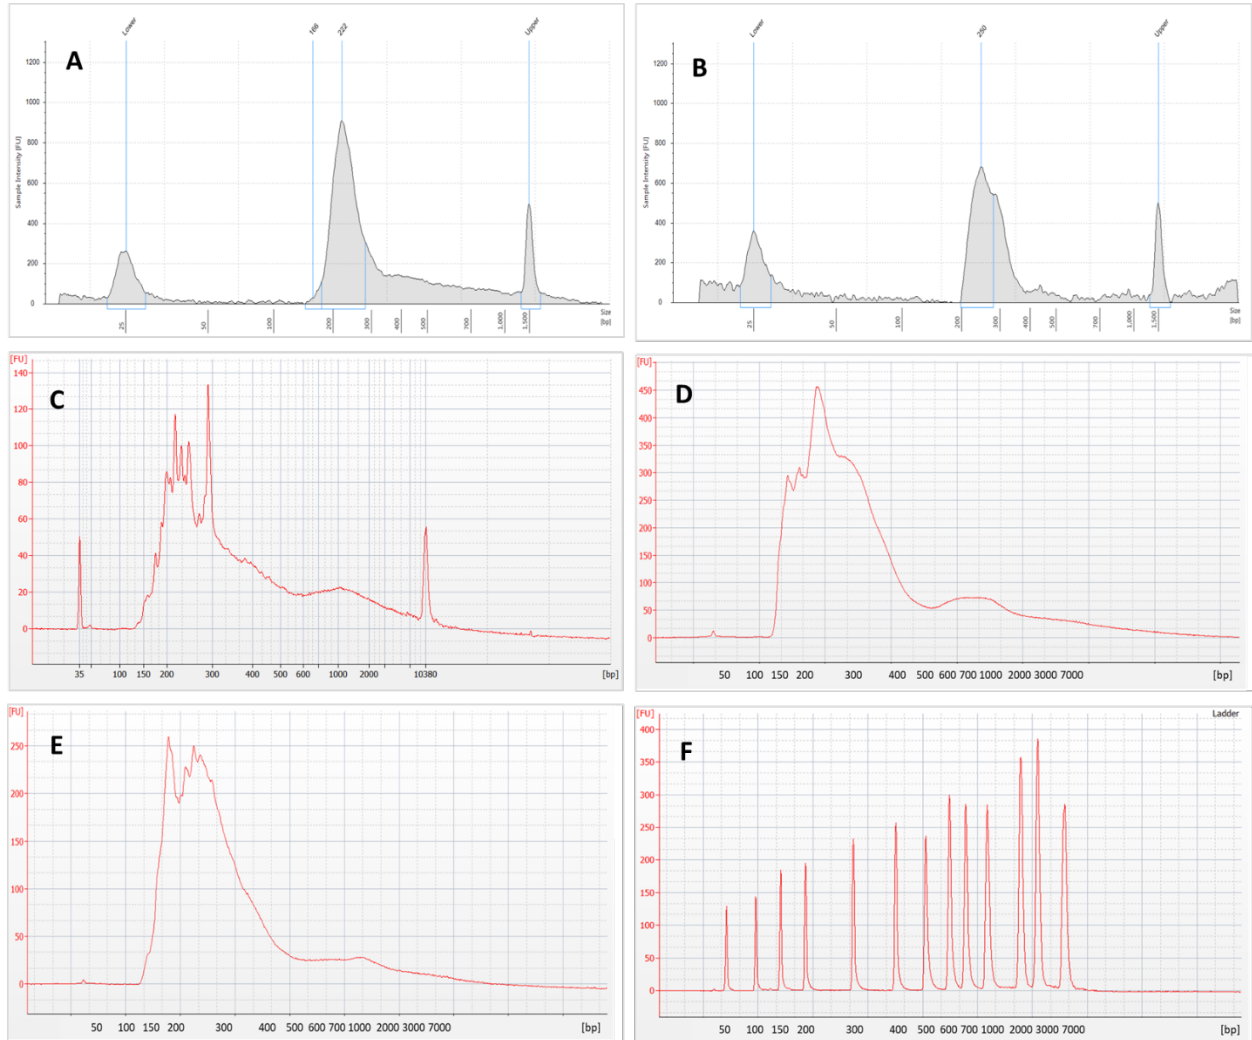



Fig. S3: TTD microscopy of EL4 cells. The membrane permeable dye (CellTracker Orange) and the membrane impermeant quencher acid blue 9 (AB9) were applied to the same cells. AB9 cannot enter the cell with intact membrane and thus cannot quench the membrane permeable dye, resulting in fluorescence signals in cells with intact membrane (green arrow). Leaky (orange arrow) or damaged membrane (red arrow) allows for the quencher to enter the cell, resulting in reduced or diminished fluorescence of the cell.

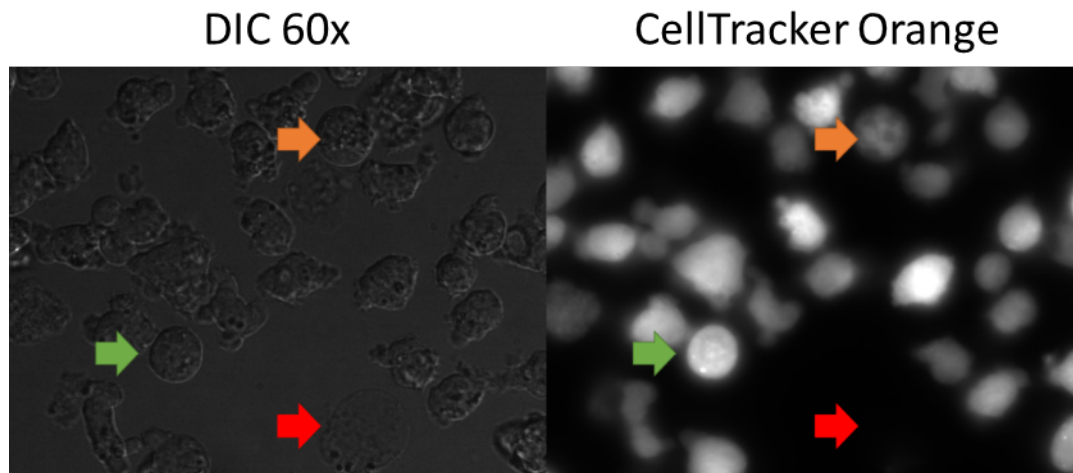

Fig. S4: Images of healthy donor PBMCs from imaging flow cytometry. Cells were labeled with cell display markers CD14, CD3 $\epsilon$ , and CD19 to differentiate between monocyte, T cell and B cell populations, respectively. maxRNA was hybridized with antisense oligos and observed primarily on CD14 presenting cells.

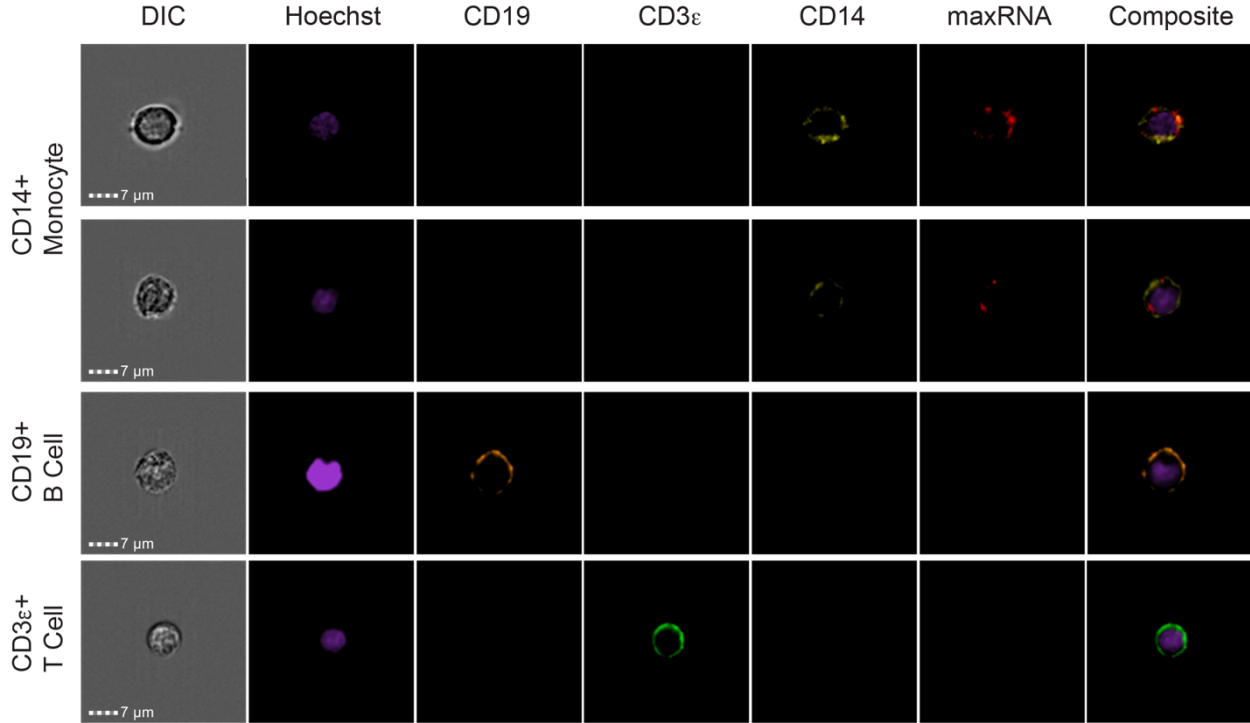

Fig. S5: tSNE plots of isFISH sorted single cells. isFISH+ (pink) and isFISH- (blue) cell clusters, and color-coded expression levels for T cell marker *CD3E*, *CD8A*, natural killer (NK) cell marker *NKG7*, and B cell marker *MS4A1*.

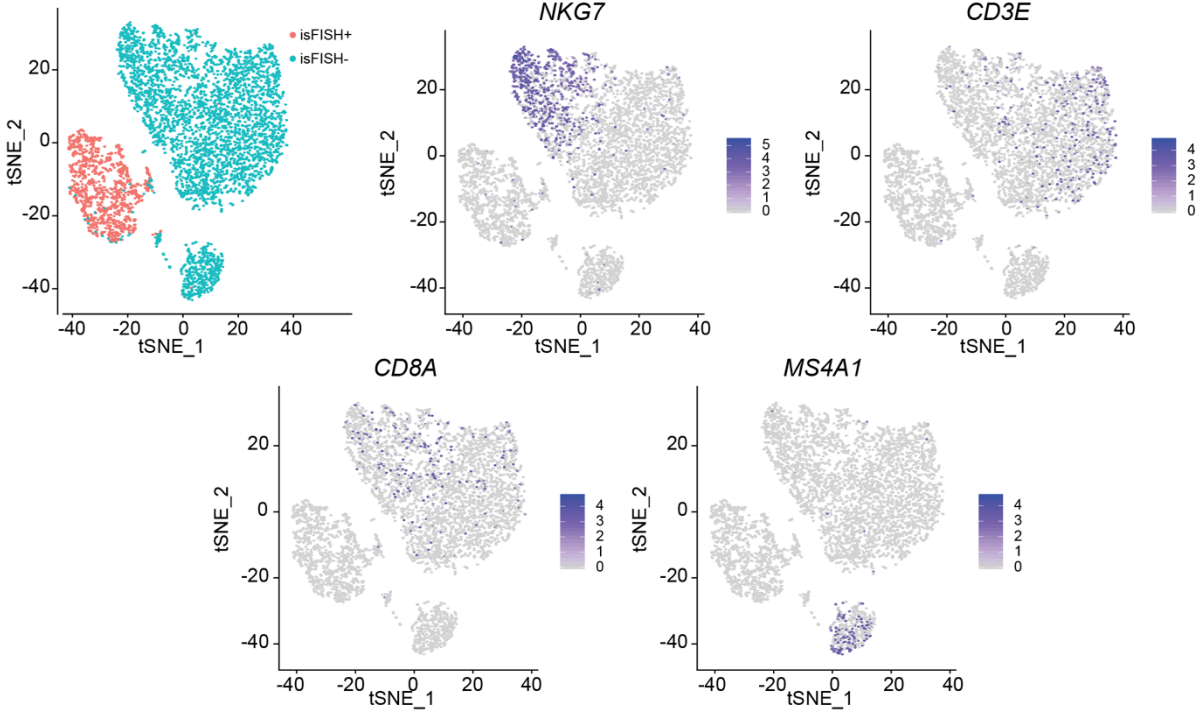

Fig. S6: Summary of Surface-FISHseq datasets. (A) The numbers of reads (blue) and uniquely mapped reads (UMR) for every Surface-FISHseq library (column), including 3 test (Membrane+) and control libraries (Membrane control) from the Surface-FISHseq-membrane experiment, the test (FACS+) and control libraries (FACS control) from the Surface-FISHseq-FACS experiment, and the test (Psoralen+) and control libraries (Psoralen control) from the Surface-FISHseq-Psoralen experiment. (B) The distribution of identified maxRNAs by transcript type. (C) The GO terms enriched in maxRNA genes (FDR <  $10^{-10}$ ), ranked by the ratio of the maxRNA genes vs. the total number of genes in this GO term (ratio of maxRNA genes in this GO term).

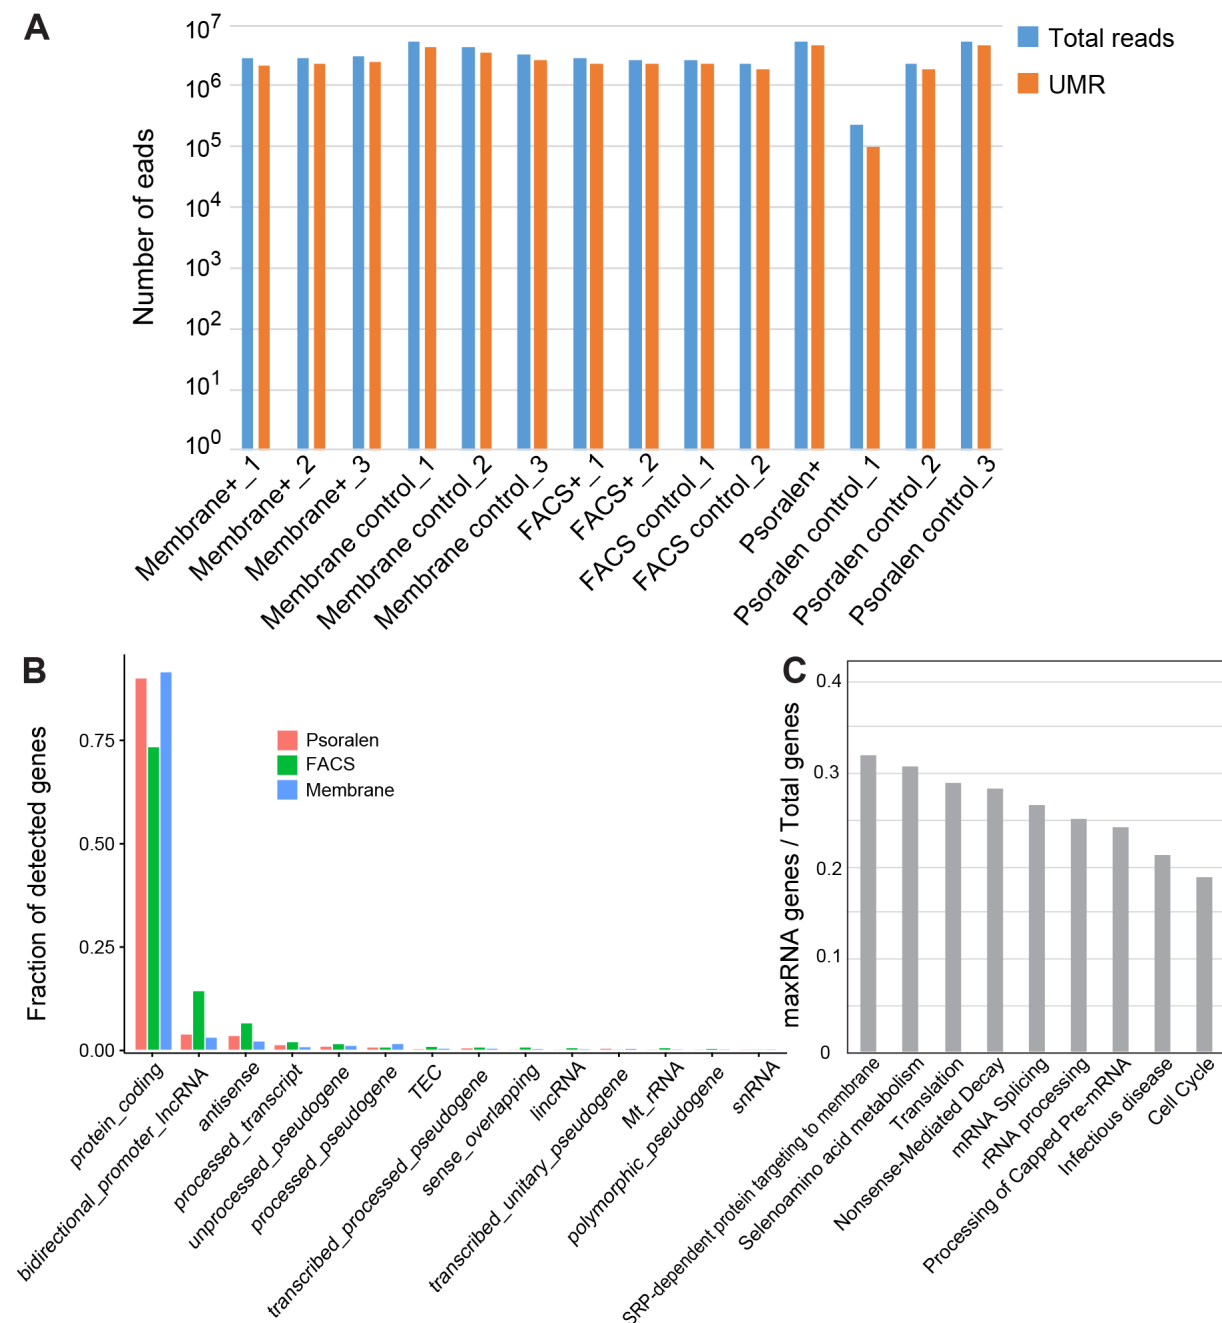

## Supplementary tables

Table S1: Summary of Surface-seq libraries. The two Surface-seq technical variations are labeled as A and B. Input cells: the approximate number of input cells. Library concentration: the concentration of the final sequencing library. Total reads: the total number of sequencing reads. UMR: uniquely mapped reads

| <b>Sample ID</b> | <b>Technical variation</b> | <b>Input cells (million)</b> | <b>Concentration (nM)</b> | <b>Total reads</b> | <b>UMR</b> |
|------------------|----------------------------|------------------------------|---------------------------|--------------------|------------|
| <b>A1</b>        | A                          | 400                          | 24                        | 22,117,239         | 9,734,312  |
| <b>A2</b>        | A                          | 400                          | 20                        | 62,069,245         | 29,931,521 |
| <b>A3</b>        | A                          | 400                          | 44                        | 15,694,988         | 8,038,032  |
| <b>B1</b>        | B                          | 400                          | 88.6                      | 120,294,072        | 55,617,225 |
| <b>B2</b>        | B                          | 400                          | 36.6                      | 106,187,703        | 56,243,455 |



Table S2: Summary of Surface-FISHseq libraries. UMR: number of uniquely mapped reads. UMP: percentage of uniquely mapped reads.

| Technical variation          | Experiment                       | Group   | ID    | Donor ID | Total Reads | UMR     | UMP    |
|------------------------------|----------------------------------|---------|-------|----------|-------------|---------|--------|
| <b>Psoralen</b>              | Probe library pulldown           | Test    | PP_1  | 9799     | 5457193     | 4697546 | 86.08% |
|                              | Non-crosslinked library pulldown | Control | PN_C1 | 9799     | 234808      | 95467   | 40.66% |
|                              | Non-crosslinked dArt4 pulldown   | Control | PN_C2 | 9799     | 5180356     | 4606128 | 88.92% |
|                              | Probe dArt4 pulldown             | Control | PN_1  | 9799     | 2377320     | 1909222 | 80.31% |
| <b>FACS</b>                  | FACS+ pulldown                   | Test    | FP_1  | 575      | 2759220     | 2301510 | 83.41% |
|                              | FACS+ pulldown                   | Test    | FP_2  | 575      | 2723909     | 2327848 | 85.46% |
|                              | FACS- pulldown                   | Control | FN_1  | 561      | 2797693     | 2325819 | 83.13% |
|                              | FACS- pulldown                   | Control | FN_2  | 561      | 2253317     | 1865421 | 82.79% |
| <b>Membrane Purification</b> | Mem pulldown                     | Test    | MP_1  | 561      | 2811824     | 2099391 | 74.66% |
|                              | Mem pulldown                     | Test    | MP_2  | 575      | 2850086     | 2325989 | 81.61% |
|                              | Mem pulldown                     | Test    | MP_3  | 730      | 3135792     | 2443210 | 77.91% |
|                              | Total membrane                   | Control | MT_1  | 561      | 5381193     | 4420311 | 82.14% |
|                              | Total membrane                   | Control | MT_2  | 575      | 4233565     | 3497718 | 82.62% |
|                              | Total membrane                   | Control | MT_3  | 730      | 3369136     | 2663567 | 79.06% |

Table S3: Probe sequences for Surface-FISH. C30 represents a 30-carbon spacer and N bases refer to equal mixture of A, C, T, or G bases.

| Sequence Name     | Sequence                                        |
|-------------------|-------------------------------------------------|
| <i>Neat1-1</i>    | Amine-C30-GAATGTCTGAGTTCTTGGCCAGCCTGGTTTACAAA   |
| <i>Neat1-2</i>    | Amine-C30-CAATCCAAGGCTTCTGGTTGAGGAATGGTGATAG    |
| <i>Neat1-3</i>    | Amine-C30-CACATTTGGGAGGCAGTCATTAGTAGATCTTTGAA   |
| <i>Neat1-4</i>    | Amine-C30-GTTTTTCAGTTAAGAATCCCTCTGACCAATGCAG    |
| <i>Neat1-5</i>    | Amine-C30-CAAGGTTTTAAGTGACCCCTTAACCTCAGAGTGAG   |
| <i>Malat1-1</i>   | Amine-C30-GTTACAAATAAACACAAGTATAACAATGCACAAGAAG |
| <i>Malat1-2</i>   | Amine-C30-GCCACTTCCTTTGTTCTATAGTAGTTATTAAGAT    |
| <i>Malat1-3</i>   | Amine-C30-CTTGATAATATAAAAGCTATCACCCAGAAGAAATTCC |
| <i>Malat1-4</i>   | Amine-C30-CTACAATCTATATTCATCCAACAGCTTCAGAAGAG   |
| <i>Malat1-5</i>   | Amine-C30-CTGAAATCATAAACTAAACAATTACCTAACACCCC   |
| <i>Malat1_Mut</i> | Amine-C30-GTTACAAATAAACANNNNNNNTACAATGCACAAGAA  |
| <i>Neat1_Mut</i>  | Amine-C30-GAATGTCTGAGTTCTTNNNNNNCCTGGTTTACAAA   |
